# Supplementary material for: GM1 Oligosaccharide Efficacy in Parkinson’s Disease: Protection against MPTP
Source: MDPI journal article supplement (doi:10.3390/biomedicines11051305), 2023-04-28
Supplement: s1 [file s1]

# GM1 Oligosaccharide Efficacy in Parkinson's Disease: Protection against MPTP

Maria Fazzari <sup>1,†</sup>, Giulia Lunghi <sup>1,†</sup>, Alexandre Henriques <sup>2</sup>, Noëlle Callizot <sup>2</sup>, Maria Grazia Ciampa <sup>1</sup>, Laura Mauri <sup>1</sup>, Simona Prioni <sup>1</sup>, Emma Veronica Carsana <sup>1</sup>, Nicoletta Loberto <sup>1</sup>, Massimo Aureli <sup>1</sup>, Luigi Mari <sup>3</sup>, Sandro Sonnino <sup>1</sup>, Elena Chiricozzi <sup>1,\*</sup> and Erika Di Biase <sup>1,\*</sup>

<sup>1</sup> Department of Medical Biotechnology and Translational Medicine, University of Milano, 20054 Segrate, MI, Italy; maria.fazzari@unimi.it (M.F.); giulia.lunghi@unimi.it (G.L.); maria.ciampa@unimi.it (M.G.C.); laura.mauri@unimi.it (L.M.); simona.prioni@unimi.it (S.P.); emma.carsana@unimi.it (E.V.C.); nicolella.loberto@unimi.it (N.L.); massimo.aureli@unimi.it (M.A.); sandro.sonnino@unimi.it (S.S.)

<sup>2</sup> Neuro-Sys, 410 Chemin Départemental 60, 13120 Gardanne, France; alexandre.henriques@neuro-sys.com (A.H.); noelle.callizot@neuro-sys.com (N.C.)

<sup>3</sup> Department of Immunology, St. Jude Children's Research Hospital, Memphis, TN 38105, USA; luigi.mari@stjude.org (L.M.)

\* Correspondence: elena.chiricozzi@unimi.it (E.C.); edibiase1@mclean.harvard.edu (E.D.B.)

† These authors equally contribute to this work.

## S1. Methods

### S1.1. MPP<sup>+</sup> Dose Effect on CGN

#### S1.1.1. MTT Assay

Viability of CGN after MPP<sup>+</sup> treatments (25, 50, and 100  $\mu$ M) was determined by MTT assay, as previously reported [38]. Briefly, after 1 h from GM1-OS incubation (100  $\mu$ M), cells plated in a 96-well were washed and incubated with 100  $\mu$ L of 2.4 mM MTT (4 mg/mL in RH) for 1 h at 37 °C in a humidified atmosphere of 95 % air/5 % CO<sub>2</sub>. Subsequently MTT was carefully removed and replaced with 2-propanol/formic acid, 95/5 (v/v). Plates were gently shaken prior to read the absorbance at 570 nm with a microplate spectrophotometer (Wallac 1420 VICTOR2™, Perkin Elmer).

#### S1.1.2 Morphological Analysis for Neurite Outgrowth Evaluation

After MPP<sup>+</sup> challenge in the presence or absence of GM1-OS, CGN, were observed by phase contrast microscopy (20X objective, Olympus BX50 microscope; Olympus, Tokyo, Japan). At least 10 fields from each well were photographed for each experiment.

## S2. Supplementary Figures

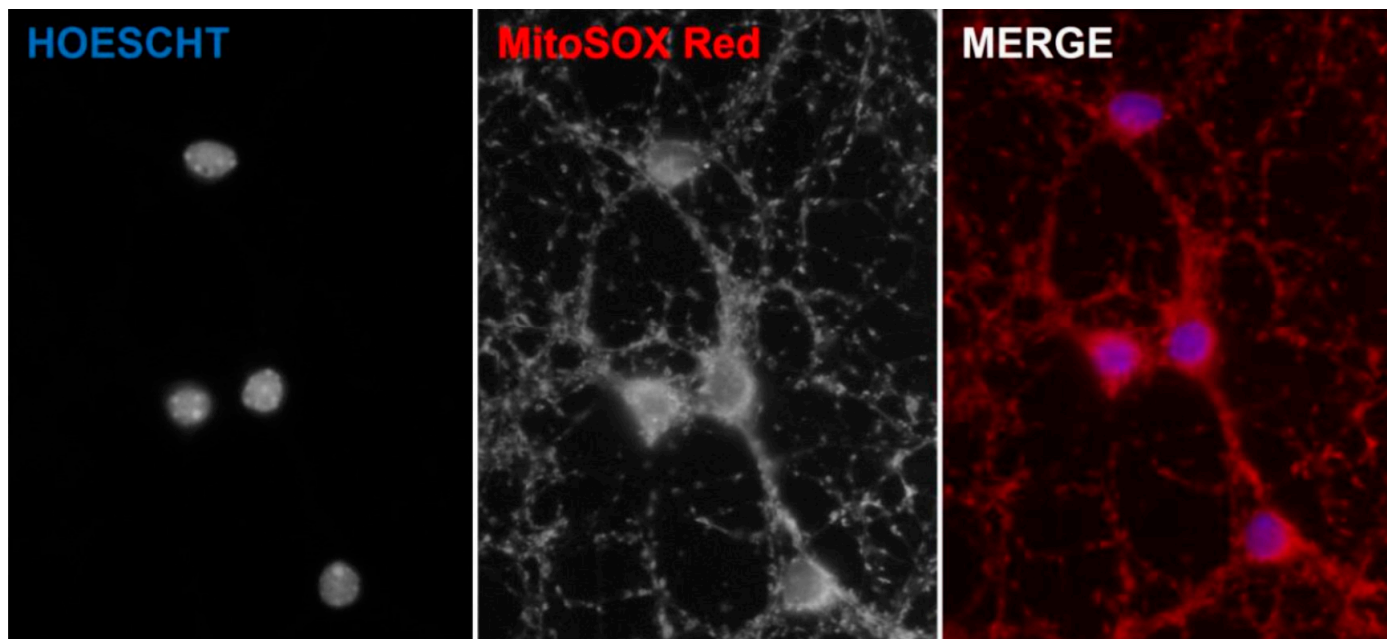

**Figure S1.** Identification of  $O_2^{\bullet-}$  content in mitochondria by MitoSOX<sup>TM</sup> red dye. Representative image of day 14 primary CGNs 47 stained with 1  $\mu$ M MitoSOX red dye in HBSS with  $Ca^{2+}$  and  $Mg^{2+}$  for 10 min at 37 °C. After MitoSOX incubation, PBS-washed CGNs were fixed and nuclei were stained by Hoechst dye. Images were acquired using a NikonEclipse Ni upright microscope with 100X objective (Red: Mitosox; Blue: Nuclei).

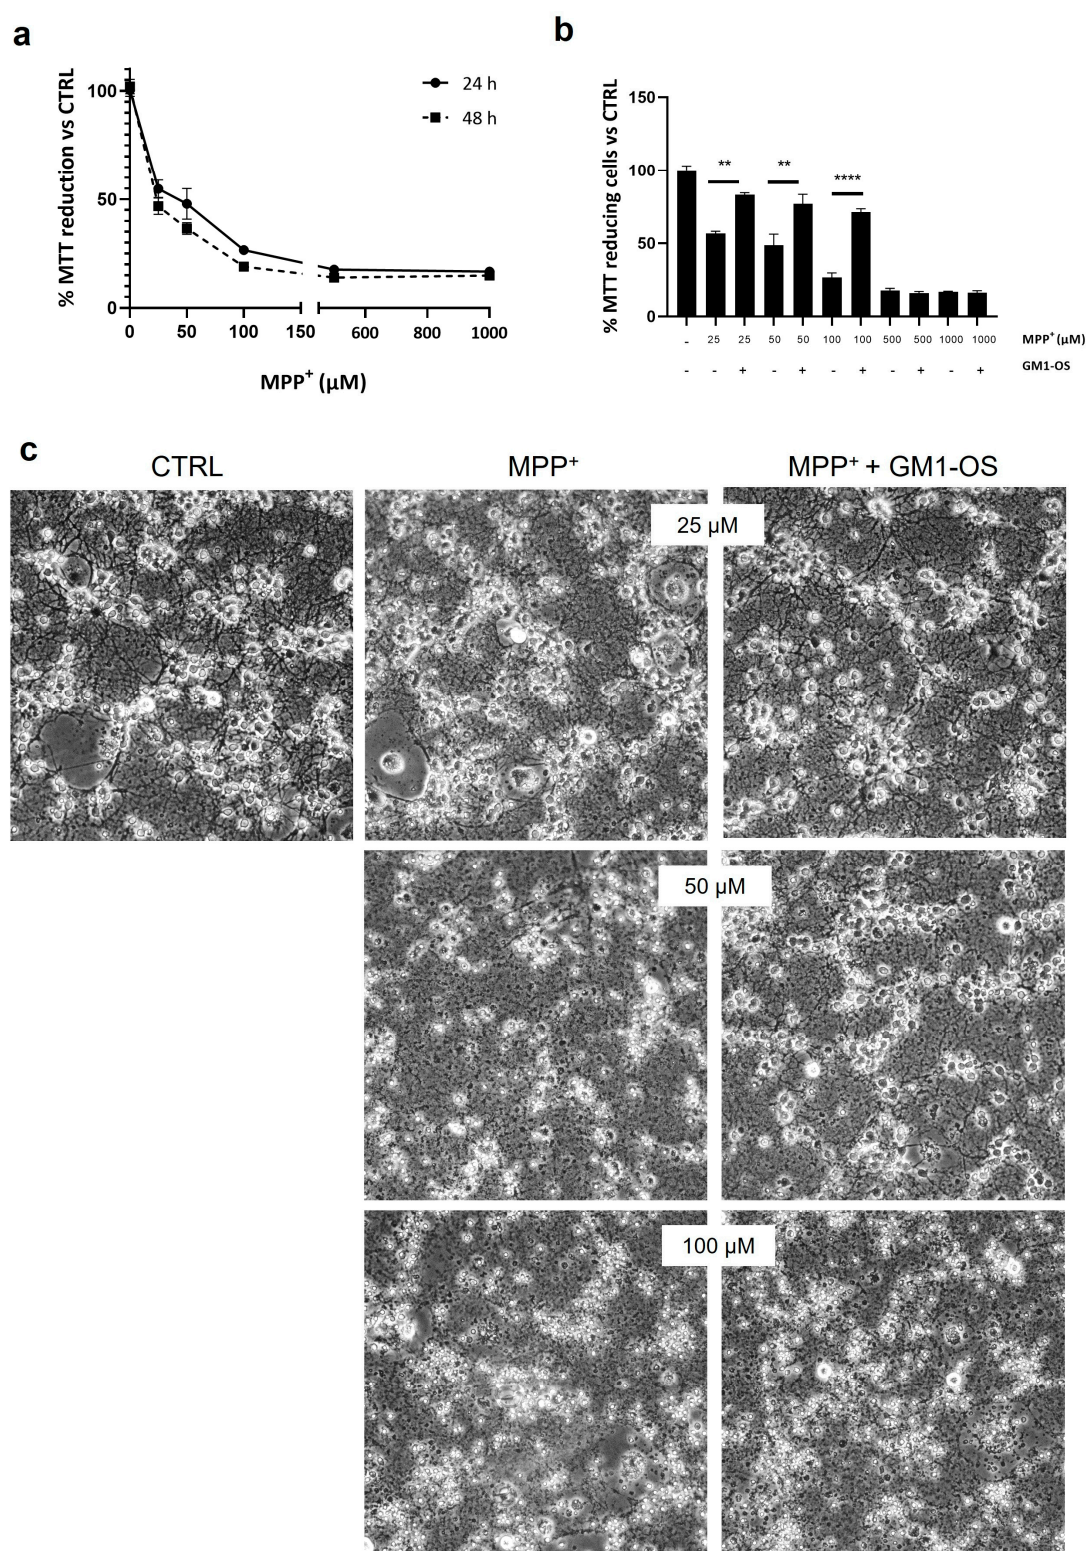

**Figure S2.** GM1-OS protected CGN injured with MPP<sup>+</sup>. **(a)** Dose-response effect of MPP<sup>+</sup> exposure on CGN after 24 h (solid line) or 48 h (dashed line). MTT assay was performed to measure cell viability; **(b)** MTT assay of MPP<sup>+</sup> exposed CGN at the indicated concentrations in the presence or absence of 100 μM GM1-OS administered 1 h prior to MPP<sup>+</sup>; **(c)** Representative phase contrast images of CGN exposed to MPP<sup>+</sup> at the indicated concentrations in the presence or absence of 100 μM GM1-OS (administered 1 h prior to MPP<sup>+</sup>). Magnification 20X. All values are expressed as mean ± SEM (n = 4). \*\* p < 0.01, \*\*\*\* p < 0.0001 One-way ANOVA followed by Tukey's multiple comparisons test).
